# Supplementary material
Source: ML conference proceedings conference paper supplement (https://openreview.net/forum?id=XfpmehHGo2)

$S = 50, A = 3, H = 10$

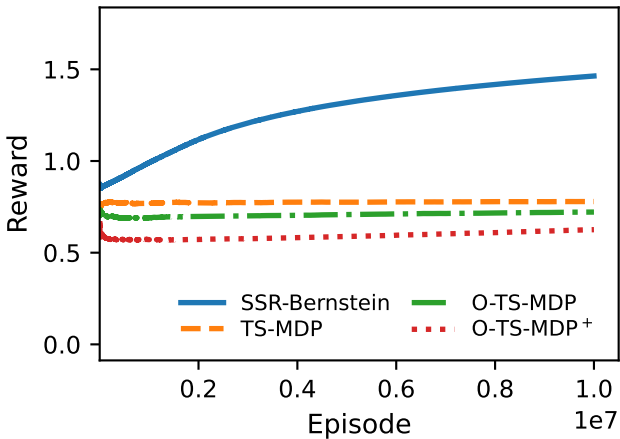

Supplement: supplementary_material [file attachment]

$S = 20, A = 3, H = 10$

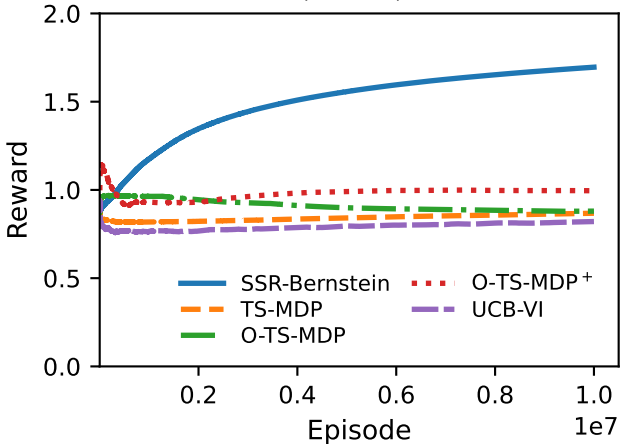

Supplement: supplementary_material [file attachment]

$S = 50, A = 3, H = 10$

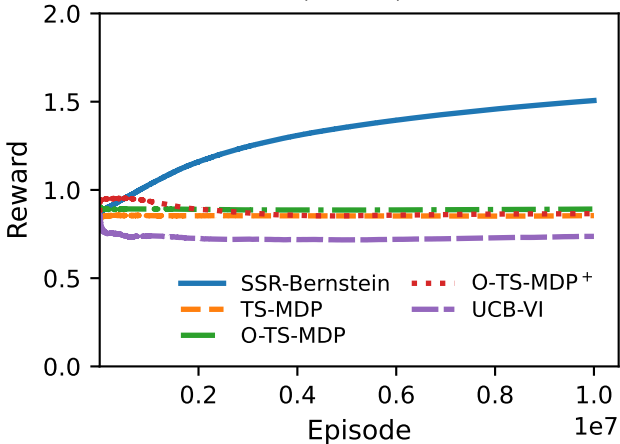

Supplement: supplementary_material [file attachment]

$S = 5, A = 3, H = 10$

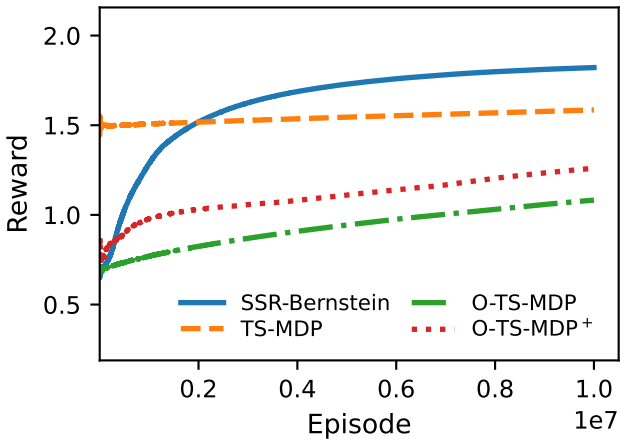

Supplement: supplementary_material [file attachment]

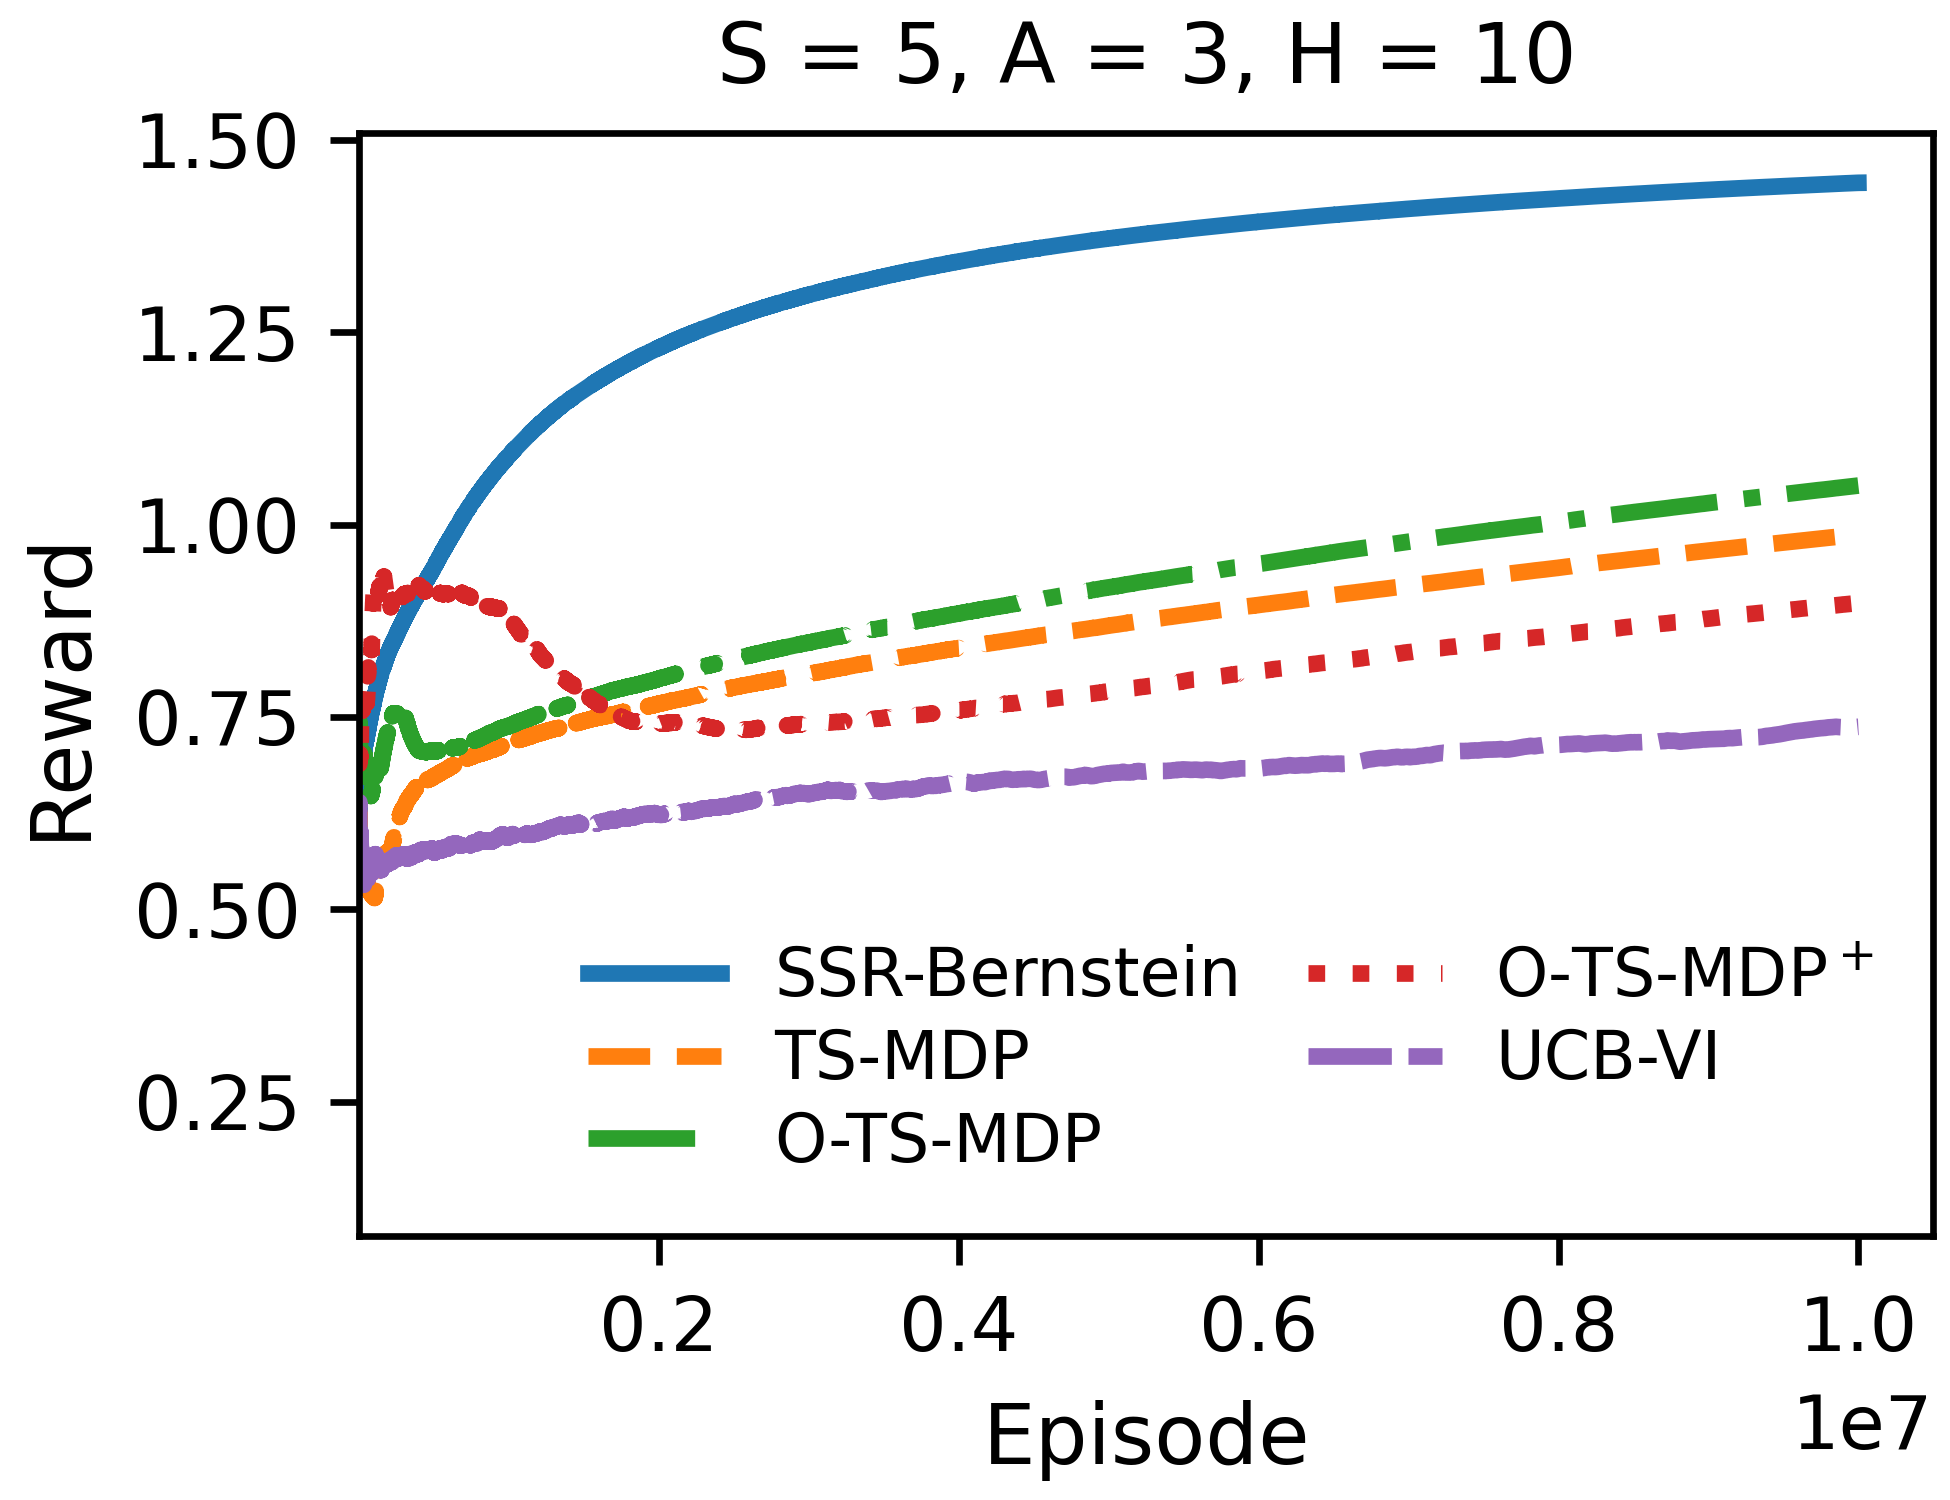

Supplement: supplementary_material [file attachment]

$S = 20, A = 3, H = 10$

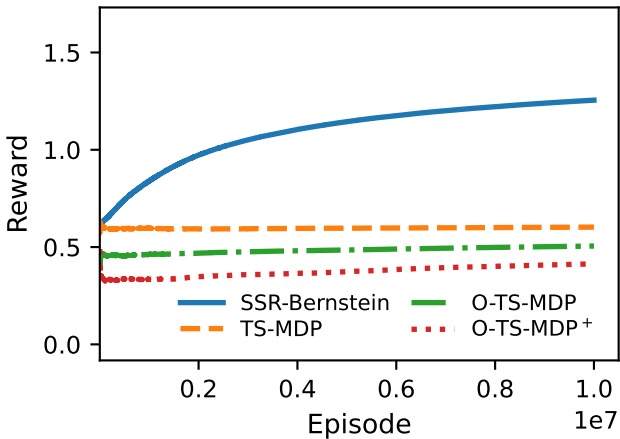

Supplement: supplementary_material [file attachment]
